# Supplementary material for: Alcohol drinking and cigarette smoking in relation to risk of active tuberculosis: prospective cohort study
Source: PubMed Central journal article supplement — BMJ Open Respir Res. 2017 Oct 13;4(1):e000247. doi: 10.1136/bmjresp-2017-000247 (PMC5652562; doi:10.1136/bmjresp-2017-000247), 2017-10-13
Supplement: bmjresp-2017-000247supp001.pdf [file bmjresp-2017-000247supp001.pdf]

**Supplementary Table 1.** Baseline characteristics of study subjects who developed tuberculosis (TB) and those who remained free of TB, the Singapore Chinese Health Study 1993-2014 Values are numbers (percentages) unless stated otherwise

| Baseline characteristics                     | TB cases<br>(n=1249) | Non-cases<br>(n=58,996) | <i>P</i> value* |
|----------------------------------------------|----------------------|-------------------------|-----------------|
| Mean (SD) age at recruitment, years          | 59.3 ± 7.9           | 56.3 ± 8.0              | <0.001          |
| Mean (SD) body mass index, kg/m <sup>2</sup> | 22.2 ± 3.5           | 23.2 ± 3.3              | <0.001          |
| Men                                          | 915 (73.3)           | 24,999 (42.4)           | <0.001          |
| Dialect group                                |                      |                         | 0.02            |
| Cantonese                                    | 539 (43.2)           | 27,438 (46.5)           |                 |
| Hokkien                                      | 710 (56.9)           | 31,558 (53.5)           |                 |
| Level of education                           |                      |                         | <0.001          |
| No formal education                          | 308 (24.7)           | 16,302 (27.6)           |                 |
| Primary school (1-6 years)                   | 667 (53.4)           | 25,849 (43.8)           |                 |
| Secondary school and above                   | 274 (21.9)           | 16,845 (28.6)           |                 |
| Smoking status                               |                      |                         | <0.001          |
| Never smoker                                 | 534 (42.8)           | 41,898 (71.0)           |                 |
| Former smoker                                | 175 (14.0)           | 6262 (10.6)             |                 |
| Current smoker                               | 540 (43.2)           | 10,836 (18.4)           |                 |
| History of diabetes                          | 175 (14.0)           | 5226 (8.9)              | <0.001          |
| Tea intake                                   |                      |                         | 0.33            |
| None                                         | 531 (42.5)           | 24,328 (41.2)           |                 |
| Monthly                                      | 155 (12.4)           | 7120 (12.1)             |                 |
| Weekly                                       | 277 (22.2)           | 14,428 (24.5)           |                 |
| Daily                                        | 286 (22.9)           | 13,120 (22.2)           |                 |
| Mean (SD) daily energy intake, kcal          | 1601 ± 574           | 1551 ± 564              | 0.002           |
| Mean (SD) daily energy-adjusted intake       |                      |                         |                 |
| Protein, g                                   | 57.6 ± 10.5          | 59.2 ± 9.9              | <0.001          |
| Cholesterol, mg                              | 175 ± 84.3           | 173 ± 74.3              | 0.42            |
| Marine omega-3 fatty acid, g                 | 0.30 ± 0.16          | 0.32 ± 0.16             | <0.001          |
| Omega-6 fatty acid, g                        | 7.30 ± 3.09          | 7.96 ± 3.18             | <0.001          |
| Vitamin A, IU                                | 4413 ± 2806          | 5152 ± 2990             | <0.001          |
| Vitamin C, mg                                | 87.5 ± 120.6         | 104 ± 133               | <0.001          |

\* *P* value by Student's *t*-test (continuous variables) or  $\chi^2$ -test (categorical variables).
